# Supplementary material for: Evaluation of the molluscicidal activities of arylpyrrole on Oncomelania hupensis, the intermediate host of Schistosoma japonicum
Source: PeerJ. 2021 Sep 27;9:e12209. doi: 10.7717/peerj.12209 (PMC8483005; doi:10.7717/peerj.12209)
Supplement: Supplemental Information 1 — All content unit is μg/g, All concentration unit is μg/mL [file peerj-09-12209-s001.xlsx]

## Sheet: Sheet1
standard curve				Recovery rate
ATP	concentration	peak area	ATP	repeat	1	2	3	4	5	6	mean	precision
	40	332.4		peak area	362	350	391	359	389	367	370.2	0.045125
	20	160.1		detected concentration	43.562	42.1179	47.0517	43.201	46.8111	44.1637	44.5487
	10	81.1		blank area	45.3	47	46.4	47.3	44.2	42.7	46.04
	5	44.5		blank concentration	5.45126	5.65584	5.58363	5.69194	5.31889	5.13839	5.54031
	2.5	23.5		Recovery rate	0.952768	0.911552	1.0367	0.937726	1.0373	0.975632	0.975211
	1.25	11.2
				Recovery rate
ADP	92	739.7	ADP	repeat	1	2	3	4	5	6	mean	precision
	40	311.6		peak area	435	416	423	439	441	419	430.8	0.0251047
	20	171.3		detected concentration	52.3466	50.0602	50.9025	52.8279	53.0686	50.4212	51.8412
	10	87.1		blank area	120	123	135	131	128	117	127.4
	5	43.9		blank concentration	14.4404	14.8014	16.2455	15.7641	15.4031	14.0794	15.3309
	2.5	23.9		Recovery rate	0.947653	0.881468	0.866426	0.926594	0.941637	0.908544	0.912756
	1.25	9.5
ATP				repeat	1	2	3
			control	peak area	40.5	37.6	43.1
				concentration	4.87365	4.52467	5.18652
				content	194.946	180.987	207.461
			1/2lc50	peak area	27	31	29.1
				concentration	3.2491	3.73045	3.50181
				content	129.964	149.218	140.072
			lc50	peak area	23	19	16
				concentration	2.76775	2.2864	1.92539
				content	110.71	91.4561	77.0156
ADP				repeat	1	2	3
			control	peak area	120	123	135
				concentration	15.4044	15.7895	17.3299
				content	616.175	631.579	693.196
			1/2lc50	peak area	121	113	131
				concentration	15.5327	14.5058	16.8164
				content	621.309	580.231	672.657
			lc50	peak area	122	119	130
				concentration	15.6611	15.276	16.6881
				content	626.444	611.04	667.522
	All content unit isμg/g
	All concentration unit isμg/Ml
