# Supplementary material for: Evaluation of the molluscicidal activities of arylpyrrole on Oncomelania hupensis, the intermediate host of Schistosoma japonicum
Source: PeerJ. 2021 Sep 27;9:e12209. doi: 10.7717/peerj.12209 (PMC8483005; doi:10.7717/peerj.12209)
Supplement: Supplemental Information 2 [file peerj-09-12209-s002.xlsx]

## Sheet: mitochondrial potential
			red fluorescence
			DMSO group			positive group			1/2LC50 group			LC50 group
		Time	Repeat1	Repeat2	Repeat3	Repeat1	Repeat2	Repeat3	Repeat1	Repeat2	Repeat3	Repeat1	Repeat2	Repeat3
		0	5703290	5793179	5794334	5858683	5887231	5878372	5864318	5863723	5858721	5889994	5803923	5900324
		5	5183230	5233753	5215240	5386362	5402812	5296352	5215240	5432753	5435562	5271844	5232319	5308334
		10	4163734	4186354	4168876	4147396	4130832	4130932	4130326	4147452	4178923	3977994	4083721	4107994
		15	3925325	3896432	3982735	3865794	3852402	3853253	3698196	3597813	3562734	3514753	3503923	3508323
		20	3682259	3522737	3688372	3540954	3515785	3547237	3367728	3354239	3398342	3265007	3193823	3262343
		ratio of DMSO group
					0	1.02725	1.01623	1.0145	1.02823	1.01218	1.01111	1.03274	1.00185	1.01829
					5	1.03919	1.0323	1.01555	1.00618	1.03802	1.04225	1.0171	0.999726	1.01785
					10	0.996076	0.986737	0.990898	0.991976	0.990707	1.00241	0.955391	0.975484	0.985396
					15	0.984834	0.9887	0.967489	0.942138	0.923361	0.894545	0.895404	0.899265	0.880883
					20	0.961625	0.998027	0.961735	0.914582	0.952168	0.921366	0.886686	0.906631	0.884494
