# Supplementary material for: Evaluation of the molluscicidal activities of arylpyrrole on Oncomelania hupensis, the intermediate host of Schistosoma japonicum
Source: PeerJ. 2021 Sep 27;9:e12209. doi: 10.7717/peerj.12209 (PMC8483005; doi:10.7717/peerj.12209)
Supplement: Supplemental Information 3 [file peerj-09-12209-s003.xlsx]

## Sheet: enzymal activities
enzymal activities of Complex I(mg prot)					negative group			LC50 group			1/2LC50 group
				Time	repeat1	repeat2	repeat3	repeat1	repeat2	repeat3	repeat1	repeat2	repeat3
				0	1.0301	1.0695	1.0503	0.9176	1.0075	1.0819	0.9888	0.9817	1.1071
protein concentration	0.9mg/ml			0.00137731	0.9126	0.9387	0.9061	0.8089	0.8912	0.9511	0.8699	0.814	0.9509
			Absorbance difference		0.1175	0.1308	0.1442	0.1087	0.1163	0.1308	0.1189	0.1677	0.1562
			enzymal activities of Complex I		349.889	389.493	429.396	323.684	346.316	389.493	354.058	499.373	465.129
enzymal activities of Complex III(mg prot)						repeat1			repeat2			repeat3
					control	0.111	0.186		0.138	0.221		0.107	0.183
					DMSO	0.088	0.256		0.116	0.262		0.064	0.212
protein concentration	0.5mg/ml				LC50	0.092	0.261		0.157	0.321		0.126	0.275
					1/2LC50	0.132	0.306		0.121	0.268		0.154	0.298
			Absorbance difference		control		0.075			0.083			0.076
					DMSO		0.168			0.146			0.148
					LC50		0.169			0.164			0.149
					1/2LC50		0.174			0.147			0.144
			ΔA		DMSO		0.093			0.063			0.065
					LC50		0.094			0.081			0.066
					1/2LC50		0.099			0.064			0.061
						enzymal activities
					DMSO		48.732			33.012			34.06
					LC50		49.256			42.444			34.584
					1/2LC50		51.876			33.536			31.964
					Time
enzymal activities of Complex IV(mg prot)					0min	blank		dmso	1/2LC50	LC50
				repeat1		0.3682		0.3594	0.3899	0.3871
				repeat2		0.3711		0.3539	0.3839	0.3913
protein concentration	0.33mg/ml			repeat3		0.3663		0.3594	0.3981	0.3891
					1min	blank		dmso	1/2LC50	LC50
				repeat1		0.3647		0.3479	0.3766	0.3765
				repeat2		0.3673		0.3414	0.3727	0.378
				repeat3		0.3636		0.3485	0.3858	0.3773
				Absorbance difference		0.0035		0.0115	0.0133	0.0106
						0.0038		0.0125	0.0112	0.0133
						0.0027		0.0109	0.0123	0.0118
				ΔA
								0.008	0.0098	0.0071
								0.0087	0.0074	0.0095
								0.0082	0.0096	0.0091
				enzymal activities				dmso	1/2LC50	LC50
								44.4233	54.4185	39.4257
								48.3103	41.0915	52.7526
								45.5339	53.3079	50.5315
